# Supplementary material for: Highly diastereoselective Prins-type cyclisation of cyclopropylvinylic aldehydes mediated by TiCl4Electronic supplementary information (ESI) available: experimental details. See http://www.rsc.org/suppdata/cc/b4/b406362g/
Source: Royal Society of Chemistry journal article supplement (doi:10.1039/b406362g), 2004-01-01

## Electronic Supplementary Information

### Highly Diastereoselective Prins-Type Cyclization of Cyclopropylvinyl Aldehydes Mediated by $\text{TiCl}_4$

Chan-Mo Yu,\* Seok-Keun Yoon, Young-Taek Hong and Ji-Min Kim

*Department of Chemistry and Laboratory for Metal-Catalyzed Reactions*

*Sungkyunkwan University, Suwon 440-746, Korea*

**General:** All reactions were run in flame dried glassware under an atmosphere of nitrogen. Diethyl ether ( $\text{Et}_2\text{O}$ ) was dried by refluxing over sodium/benzophenone ketyl until a permanent purple coloration was presented, and distilled prior to use. Tetrahydrofuran (THF) was distilled from sodium-benzophenone under  $\text{N}_2$ . Dichloromethane ( $\text{CH}_2\text{Cl}_2$ ) was distilled from  $\text{CaH}_2$  prior to use. All liquid reagents purchased from the Aldrich were distilled properly prior to use, unless otherwise indicated. Purification was conducted by flash column chromatography on silica gel (230-400 mesh), eluting with a mixture of hexane and ethyl acetate, unless otherwise stated. Silica gel 60 (TA792685, 230-400 mesh) from Merck was used for column chromatography. All reactions were monitored by thin layer chromatography carried out on Merck silica gel plate (60 F<sub>254</sub>) using UV light as visualizing agent and ethanolic anisaldehyde solution and heat as developing agent. The reported yields refer to isolated products. FT-IR spectra were recorded on a Nicolet 320.  $^1\text{H}$  NMR spectra were recorded on a Varian Unity Inova at 500 MHz in  $\text{CDCl}_3$  as a solvent with TMS or residual chloroform as the internal standard.  $^{13}\text{C}$  NMR spectra were measured on a Varian Unity Inova at 125 MHz in  $\text{CDCl}_3$  as a solvent.

**7-Cyclopropyl-hept-6-enal (1a):** A colorless oil, TLC,  $R_f$  0.41 (10:1 hexane/EtOAc); IR (neat) 3079, 3005, 2858, 1725, 1454, 1417, 1089, 940, 733  $\text{cm}^{-1}$ ;  $^1\text{H}$  NMR (500 MHz,  $\text{CDCl}_3$ )  $\delta$  0.30 (m, 3H,  $\text{CH}_2\text{-CH}_2\text{-CH}$ ), 0.70 (m, 2H,  $\text{CH}_2\text{-CH}_2\text{-CH}$ ), 0.87 (m, 3H,  $\text{CH}_2\text{-CH}_2\text{-CH}$ ), 1.34 (m, 4H,  $\text{CH}_2\text{-CH}_2\text{-CH}_2$ ), 1.46 (m, 4H,  $\text{CH}_2\text{-CH}_2\text{-CH}_2$ ), 1.67 (m, 3H,  $\text{CH}_2\text{-CH}_2\text{-CH}_2$ ), 1.99 (m, 1H,  $\text{CH}_2\text{-CH}_2\text{-CH}$ ), 2.18 (m, 2H,  $\text{CH}_2\text{-CH}_2\text{-CH=CH}$ ), 2.43 (m, 3H,  $\text{CH}_2\text{-CH}_2\text{-CHO}$ ), 4.74 (m, 1H,  $\text{CH}_2\text{-CH=CH}$ ), 5.29 (m, 1H,  $\text{CH=CH-CH}$ ), 9.75 (m, 1H,  $\text{CH}_2\text{-CHO}$ );  $^{13}\text{C}$  NMR (125 MHz,  $\text{CDCl}_3$ )  $\delta$  6.8, 7.2, 10.0, 13.9, 21.9, 27.6, 29.5, 32.5, 44.2, 127.7, 134.8, 203.1; HRMS calcd for  $\text{C}_{10}\text{H}_{16}\text{O}$ : 152.1201. found: 152.1209

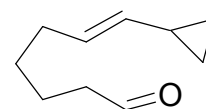

**1a**

***N*-(3-Cyclopropyl-allyl)-4-methyl-*N*-(2-oxo-ethyl)**

**benzenesulfonamide (1c):** A colorless oil, TLC,  $R_f$  0.57 (1:1 hexane/EtOAc); IR (neat) 3083, 3005, 2925, 1733, 16665, 1598, 1450,

1342, 815  $\text{cm}^{-1}$ ;  $^1\text{H}$  NMR (500 MHz,  $\text{CDCl}_3$ )  $\delta$  0.31 (m, 2H,  $\text{CH}_2\text{-CH}_2\text{-}$

CH), 0.70 (m, 2H,  $\text{CH}_2\text{-CH}_2\text{-CH}$ ) 1.33 (m, 1H,  $\text{CH}_2\text{-CH-CH}_2$ ), 2.44 (s, 3H,  $\text{CH}_3\text{-C}(\text{CH}_2)_2$ ), 3.73

(dd, 2H,  $J = 7.0, 1.0$  Hz,  $\text{TsN-CH}_2\text{-CH}$ ), 3.75 (d, 2H,  $J = 1.4$  Hz  $\text{TsN-CH}_2\text{-CHO}$ ), 5.07 (ddt, 1H,

$J = 15.5, 9.0, 1.0$  Hz,  $\text{CH=CH-CH}$ ), 5.33 (dt, 1H,  $J = 15.5, 7.0$  Hz,  $\text{CH}_2\text{-CH=CH}$ ), 7.33 (d, 2H,

$J = 7.9$  Hz, 2( $\text{C-CH=CH}$ )), 7.69 (d, 2H,  $J = 7.9$  Hz, 2( $\text{CH=CH-CSO}_2$ )), 9.58 (d, 1H,  $J = 1.4$  Hz,

$\text{CH}_2\text{-CHO}$ );  $^{13}\text{C}$  NMR (125 MHz,  $\text{CDCl}_3$ )  $\delta$  7.1, 13.6, 21.8, 51.9, 53.7, 56.0, 120.7, 127.7,

130.2, 135.2, 142.3, 144.2, 199.0; HRMS calcd for  $\text{C}_{15}\text{H}_{19}\text{NO}_3\text{S}$ : 293.1086. found: 293.1077.

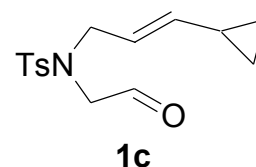

***N*-(3-Cyclopropyl-allyl)-4-methyl-*N*-(3-oxo-propyl)-**

**benzenesulfonamide (1d):** A colorless oil, TLC,  $R_f$  0.33 (2:1 hexane/EtOAc); IR (neat) 3058, 2999, 2925, 1723, 1664, 1450, 1339,

1158, 738  $\text{cm}^{-1}$ ;  $^1\text{H}$  NMR (500 MHz,  $\text{CDCl}_3$ )  $\delta$  0.31 (m, 2H,  $\text{CH}_2\text{-CH}_2\text{-}$

CH), 0.69 (m, 2H,  $\text{CH}_2\text{-CH}_2\text{-CH}$ ), 1.31 (m, 1H,  $\text{CH}_2\text{-CH-CH}_2$ ) 2.43 (s,

3H,  $\text{CH}_3\text{-C}(\text{CH}_2)_2$ ), 2.79 (td, 2H,  $J = 7.0, 1.1$  Hz,  $\text{CH}_2\text{-CH}_2\text{-CHO}$ ), 3.40 (t, 2H,  $J = 7.0$  Hz,  $\text{TsN-}$

$\text{CH}_2\text{-CH}_2$ ) 3.72 (dd, 2H,  $J = 6.8, 1.1$  Hz,  $\text{TsN-CH}_2\text{-CH}$ ), 5.10 (ddt, 1H,  $J = 15.5, 8.7, 1.1$  Hz,

$\text{CH=CH-CH}$ ) 5.28 (dt, 1H,  $J = 15.5, 6.8, 1.1$  Hz,  $\text{CH}_2\text{-CH=CH}$ ), 7.31 (d, 2H,  $J = 7.9$  Hz, 2( $\text{C-}$

$\text{CH=CH}$ )), 7.68 (d, 2H,  $J = 7.9$  Hz, 2( $\text{CH=CH-CSO}_2$ )), 9.76 (d, 1H,  $J = 1.1$  Hz,  $\text{CH}_2\text{-CHO}$ );

$^{13}\text{C}$  NMR (125 MHz,  $\text{CDCl}_3$ )  $\delta$  7.2, 13.7, 21.9, 41.0, 44.3, 51.3, 121.8, 127.7, 130.2, 140.5,

143.9, 200.9; HRMS calcd for  $\text{C}_{16}\text{H}_{21}\text{O}_3$ : 307.1242. found: 307.1242.

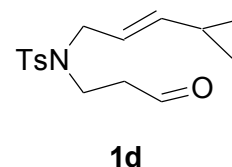

**2-(3-Cyclopropyl-allyl)-2-(3-oxo-propyl)-malonic acid diethyl ester**

**(1e):** A colorless oil, TLC,  $R_f$  0.21 (5:1 hexane/EtOAc); IR (neat) 3081,

2983, 1728, 1446, 1368, 1265, 1193, 137  $\text{cm}^{-1}$ ;  $^1\text{H}$  NMR (500 MHz,

$\text{CDCl}_3$ )  $\delta$  0.30 (m, 2H,  $\text{CH}_2\text{-CH}_2\text{-CH}$ ), 0.67 (m, 2H,  $\text{CH}_2\text{-CH}_2\text{-CH}$ ),

1.26 (t, 6H,  $J = 7.3$  Hz, 2( $\text{CH}_3\text{-CH}_2\text{-CO}_2$ )), 1.33 (m, 1H,  $\text{CH}_2\text{-CH-CH}_2$ ) 2.18 (t, 2H,  $J = 7.8$  Hz,

$\text{C-CH}_2\text{-CH}_2$ ), 2.47 (td, 2H,  $J = 7.8, 1.2$  Hz,  $\text{CH}_2\text{-CH}_2\text{-CHO}$ ) 2.57 (dd, 2H,  $J = 7.6, 1.0$  Hz, ,  $\text{C-}$

$\text{CH}_2\text{-CH}$ ), 2.18 (q, 4H,  $J = 7.3$  Hz, 2( $\text{CH}_3\text{-CH}_2\text{-CO}_2$ )), 5.04 (ddt, 1H,  $J = 15.1, 8.5, 1.0$  Hz,

$\text{CH=CH-CH}$ ) 5.32 (dt, 1H,  $J = 15.1, 7.6$  Hz,  $\text{CH}_2\text{-CH=CH}$ ), 9.74 (d, 1H,  $J = 1.2$  Hz,  $\text{CH}_2\text{-}$

$\text{CHO}$ );  $^{13}\text{C}$  NMR (125 MHz,  $\text{CDCl}_3$ )  $\delta$  6.8, 13.8, 14.3, 36.9, 39.4, 57.1, 61.5, 120.8, 139.3,

171.1, 201.1; HRMS calcd for  $\text{C}_{16}\text{H}_{24}\text{O}_5$ : 296.1624. found: 296.1643.

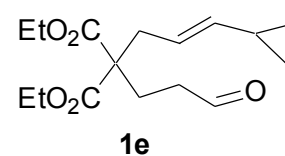

### General Procedure for Cyclisation

**2-(4-Chloro-but-1-enyl)-cyclohexanol (2a):** A flame-dried Schlenk flask containing of 7-cyclopropyl-hept-6-enal (**1a**, 100 mg, 0.66 mmol) was evacuated and carefully purged with nitrogen three times and then charged with dry CH<sub>2</sub>Cl<sub>2</sub> (3 mL), and then the solution was cooled to -78 °C. To a stirred solution at -78 °C was added TiCl<sub>4</sub> (80 μL, 0.72 mmol) in CH<sub>2</sub>Cl<sub>2</sub> (0.5 mL) with gas-tight syringe via a syringe pump over 10 min along the wall of the flask while keeping the temperature at -78 °C. The resulting solution was allowed to stir at -78 °C for 2 h, and then warmed to 0 °C. The reaction was quenched by addition of aqueous NaHCO<sub>3</sub> (3 mL), and then the aqueous layer was extracted with CH<sub>2</sub>Cl<sub>2</sub> (3 x 15). The organic extracts were dried over MgSO<sub>4</sub>, filtered, and concentrated under reduced pressure. The crude product was purified by SiO<sub>2</sub> column chromatography to give **2a** (92 mg, 0.49 mmol, 74%) as a colorless oil: TLC, *R<sub>f</sub>* 0.36 (2:1 hexane/EtOAc); IR (neat) 3440, 3047, 2931, 1446, 1266, 1061, 973. 737 cm<sup>-1</sup>; <sup>1</sup>H NMR (500 MHz, CDCl<sub>3</sub>) δ 1.31 (m, 1H, CH<sub>2</sub>-CH<sub>2</sub>-CH<sub>2</sub>), 1.41 (m, 1H, CH<sub>2</sub>-CH<sub>2</sub>-CH<sub>2</sub>), 1.47-1.77 (m, 6H, CH<sub>2</sub>-CH<sub>2</sub>-CH<sub>2</sub>-CH<sub>2</sub>-CH), 2.27 (ddd, 1H, *J* = 13.2, 3.9, 2.8 Hz, CH-CH-CH<sub>2</sub>), 2.51 (td, 2H, *J* = 13.5, 6.8 Hz, CH-CH<sub>2</sub>-CH<sub>2</sub>Cl), 3.56 (t, 2H, *J* = 6.8 Hz, CH<sub>2</sub>-CH<sub>2</sub>-Cl), 3.82 (ddd, 1H, *J* = 5.6, 2.8, 2.8 Hz, CH<sub>2</sub>-CH-OH), 5.50 (ddt, 1H, *J* = 15.5, 6.8, 1.4 Hz, CH-CH=CH), 5.68 (ddt, 1H, *J* = 15.5, 6.8, 1.1 Hz, <sub>2</sub>); <sup>13</sup>C NMR (125 MHz, CDCl<sub>3</sub>) δ 21.4, 24.5, 26.6, 32.5, 36.3, 44.8, 70.0, 127.9, 135.3; HRMS calcd for C<sub>10</sub>H<sub>17</sub>ClO: 188.0968. found: 188.0976.

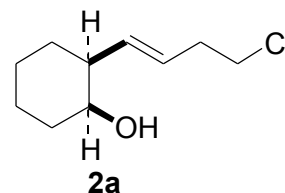

**2-(4-Chloro-but-1-enyl)-cyclopentanol (2b):** A colorless oil, TLC, *R<sub>f</sub>* 0.35 (2:1 hexane/EtOAc); IR (neat) 3382, 3049, 2957, 1447, 1266, 1086, 972, 738. cm<sup>-1</sup>; <sup>1</sup>H NMR (500 MHz, CDCl<sub>3</sub>) δ 1.40 (m, 1H, CH<sub>2</sub>-CH<sub>2</sub>-CH<sub>2</sub>), 1.56 (m, 1H, CH<sub>2</sub>-CH<sub>2</sub>-CH<sub>2</sub>), 1.64 (m, 1H, CH<sub>2</sub>-CH<sub>2</sub>-CH) 1.74 (m, 1H, CH<sub>2</sub>-CH<sub>2</sub>-CH), 1.91 (m, 1H, CH<sub>2</sub>-CH<sub>2</sub>-CHOH), 1.98 (m, 1H, CH<sub>2</sub>-CH<sub>2</sub>-CHOH), 2.30 (m, 1H, CH<sub>2</sub>-CH-CH), 2.48 (m, 2H, CH-CH<sub>2</sub>-CH<sub>2</sub>Cl) 3.53 (td, 2H, *J* = 7.0, 1.4 Hz, CH<sub>2</sub>-CH<sub>2</sub>-Cl), 3.84 (ddd, 1H, *J* = 7.0, 7.0, 7.0 Hz, CH<sub>2</sub>-CH-OH), 5.49 (m, 2H, CH-CH=CH-CH<sub>2</sub>). <sup>13</sup>C NMR (125 MHz, CDCl<sub>3</sub>) δ 21.4, 30.1, 33.7, 36.1, 44.6, 52.1, 78.7, 126.8, 135.9. HRMS calcd for C<sub>9</sub>H<sub>15</sub>ClO: 174.0811. found: 174.0813.

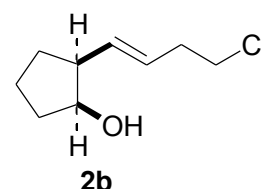

**4-(4-Chloro-but-1-enyl)-1-(toluene-4-sulfonyl)-pyrrolidin-3-ol (2c):** A white solid, T TLC, *R<sub>f</sub>* 0.32 (1:1 hexane/EtOAc); IR (neat): 3406, 3054, 2987, 1664, 1422, 1265, 1022, 896 cm<sup>-1</sup>; <sup>1</sup>H NMR (500 MHz, CDCl<sub>3</sub>) δ 2.41 (m, 2H, CH-CH<sub>2</sub>-CH<sub>2</sub>Cl), 2.45 (s, 3H, CH<sub>3</sub>-C(CH<sub>3</sub>)<sub>2</sub>), 2.57 (ddd, 1H, *J* = 6.7, 6.7, 6.7 Hz, CH<sub>2</sub>-CH-CH),

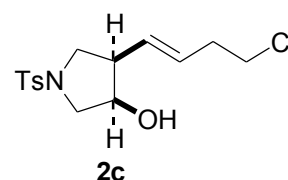

3.14 (m, 2H, TsN-CH<sub>2</sub>-CH), 3.48 (t, 2H, *J* = 6.7 Hz, CH<sub>2</sub>-CH<sub>2</sub>-Cl), 3.56 (ddd, 2H, *J* = 10.5, 7.6, 15.2 Hz, TsN-CH<sub>2</sub>-CHOH), 3.97 (m, 1H, CH<sub>2</sub>-CH-OH), 5.24 (dddd, 1H, *J* = 15.2, 8.2, 1.8, 1.5 Hz, CH-CH=CH), 5.51 (dddd, 1H, *J* = 15.2, 7.6, 6.7, 0.6 Hz, CH=CH-CH<sub>2</sub>), 7.34 (d, 2H, *J* = 7.9 Hz, 2(C-CH=CH)), 7.73 (d, 2H, 2H, *J* = 7.9 Hz, 2(CH=CH-CSO<sub>2</sub>)); <sup>13</sup>C NMR (125 MHz, CDCl<sub>3</sub>) δ 21.8, 49.1, 49.5, 51.3, 54.5, 73.1, 127.8, 128.0, 129.9, 130.0, 133.8, 143.9; HRMS calcd for C<sub>15</sub>H<sub>20</sub>ClNO<sub>3</sub>S: 329.0852. found: 381.1796.

### 3-(4-Chloro-but-1-enyl)-1-(toluene-4-sulfonyl)-piperidin-4-ol

**(2d):** A white solid, TLC, *R<sub>f</sub>* 0.33 (1:1 hexane/EtOAc); IR (neat) 3397, 3054, 2987, 1643, 1421, 1265, 1020, 896 cm<sup>-1</sup>; <sup>1</sup>H NMR (500 MHz, CDCl<sub>3</sub>) δ 2.02 (m, 1H, CH<sub>2</sub>-CH-CH), 2.23 (m, 1H, CH<sub>2</sub>-CH<sub>2</sub>-CHOH), 2.28 (m, 1H, CH<sub>2</sub>-CH<sub>2</sub>-CHOH), 2.43 (m, 2H, CH-CH<sub>2</sub>-CH<sub>2</sub>), 2.44 (s, 3H, CH<sub>3</sub>-C(CH<sub>2</sub>)<sub>2</sub>), 2.48 (m, 1H, TsN-CH<sub>2</sub>-CH<sub>2</sub>), 2.53 (m, 1H, TsN-CH<sub>2</sub>-CH<sub>2</sub>), 3.23 (ddd, 1H, *J* = 4.1, 2.8, 2.8 Hz, CH<sub>2</sub>-CH-OH), 3.56 (m, 2H, CH<sub>2</sub>-CH<sub>2</sub>-Cl), 3.69 (m, 2H, TsN-CH<sub>2</sub>-CH), 3.76 (m, 1H, TsN-CH<sub>2</sub>-CH), 5.28 (ddt, 1H, *J* = 15.5, 8.4, 1.2 Hz, CH-CH=CH), 5.67 (ddd, 1H, *J* = 15.5, 6.8, 6.8 Hz, CH=CH-CH<sub>2</sub>), 7.33 (d, 2H, *J* = 8.0 Hz, 2(C-CH=CH)), 7.65 (d, 2H, *J* = 8.0 Hz, 2(CH=CH-CSO<sub>2</sub>)); <sup>13</sup>C NMR (125 MHz, CDCl<sub>3</sub>) δ 21.8, 32.2, 35.9, 44.1, 45.0, 48.0, 49.0, 71.0, 127.9, 130.0, 131.0, 131.7, 133.6, 143.9; HRMS calcd for C<sub>16</sub>H<sub>22</sub>ClNO<sub>3</sub>S: 343.1009. found: 343.1007.

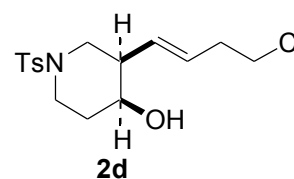

### 3-(4-Chloro-but-1-enyl)-4-hydroxy-cyclohexane-1,1-

**dicarboxylic acid diethyl ester (2e):** TLC, *R<sub>f</sub>* 0.20 (2:1 hexane/EtOAc); IR (neat) 3438, 3053, 2985, 1725, 1444, 1422, 1265, 908, 737 cm<sup>-1</sup>; <sup>1</sup>H NMR (500 MHz, CDCl<sub>3</sub>) δ 1.27 (m, 6H, 2(CH<sub>3</sub>-CH<sub>2</sub>-CO<sub>2</sub>)), 1.69 (m, 1H, CH<sub>2</sub>-CH-CH), 1.92 (m, 1H, CH<sub>2</sub>-CH<sub>2</sub>-CH-OH), 2.00-2.18 (m, 4H), 2.38 (m, 1H, C-CH<sub>2</sub>-CH), 2.53 (m, 2H, CH-CH<sub>2</sub>-CH<sub>2</sub>-Cl), 3.57 (m, 2H, CH<sub>2</sub>-CH<sub>2</sub>-Cl), 3.88 (ddd, 1H, *J* = 5.1, 2.5, 2.5 Hz, CH<sub>2</sub>-CH<sub>2</sub>-OH), 4.21 (m, 4H, 2(CH<sub>3</sub>-CH<sub>2</sub>-CO<sub>2</sub>)), 5.55 (dddd, 1H, *J* = 15.7, 6.8, 6.8, 1.1 Hz, CH-CH=CH), 5.63 (ddt, 1H, *J* = 15.7, 5.6, 1.1 Hz, CH=CH-CH<sub>2</sub>); <sup>13</sup>C NMR (125 MHz, CDCl<sub>3</sub>) δ 14.3, 24.5, 29.2, 36.1, 40.8, 44.5, 54.9, 61.4, 61.6, 67.5, 127.8, 135.0, 171.3, 172.2. HRMS calcd for C<sub>16</sub>H<sub>25</sub>ClO<sub>5</sub>: 332.1391. found: 332.1381.

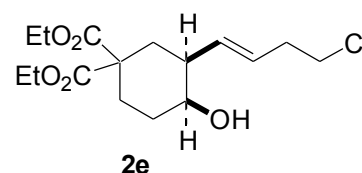

# Copies of $^1\text{H}$ NMR (500 MHz) and $^{13}\text{C}$ NMR (125 MHz) Spectra

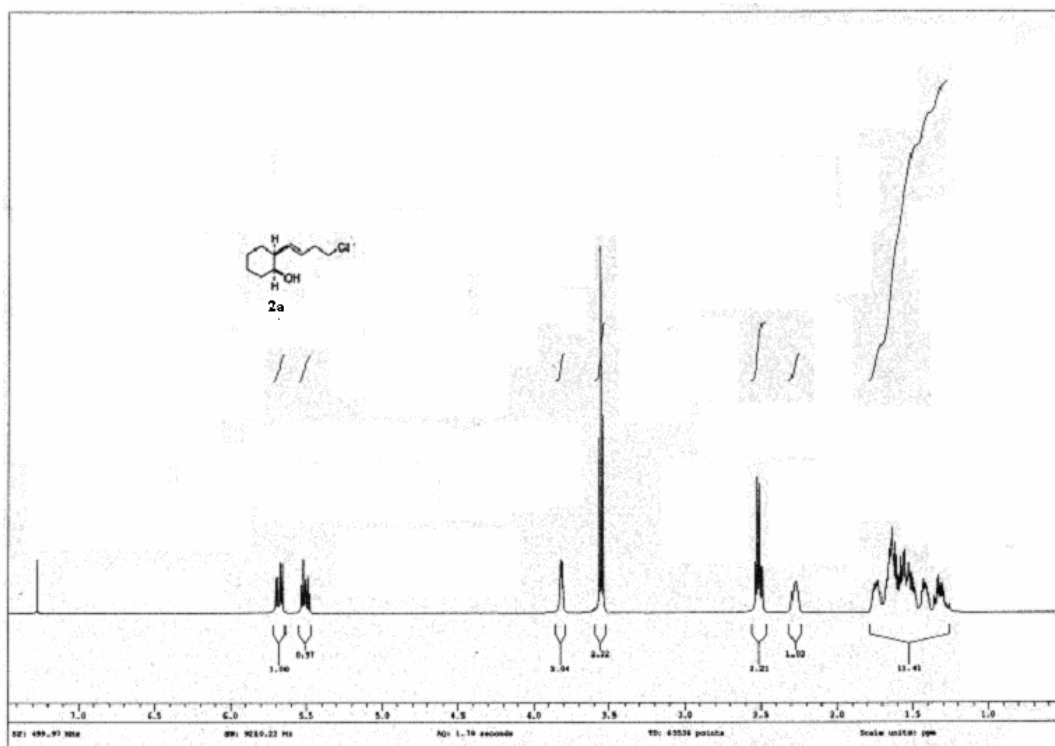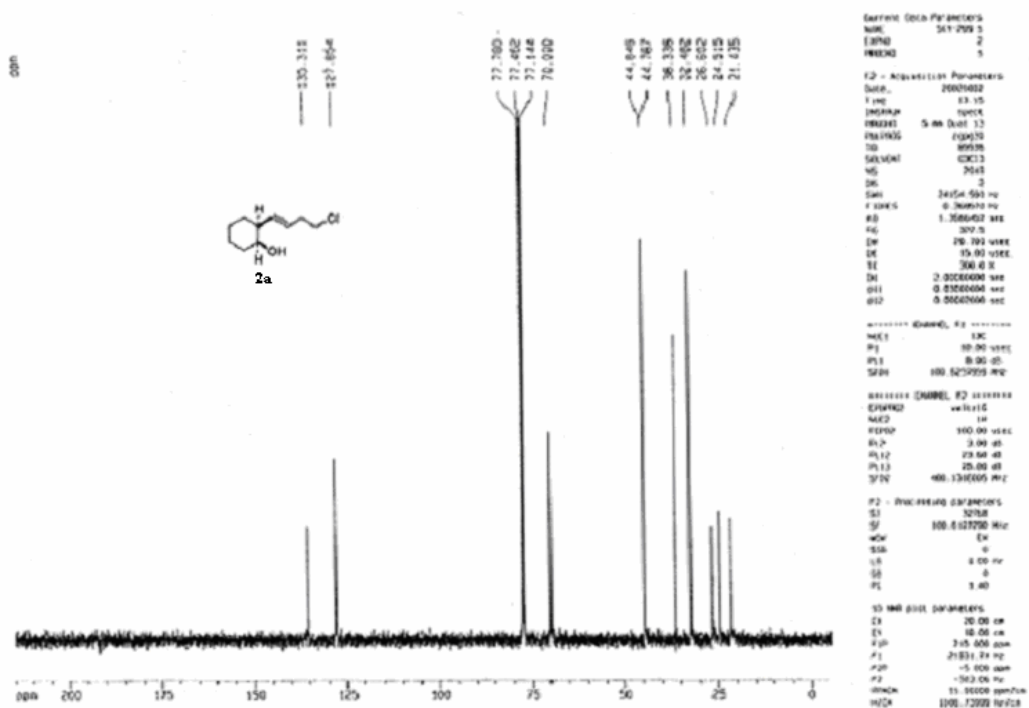

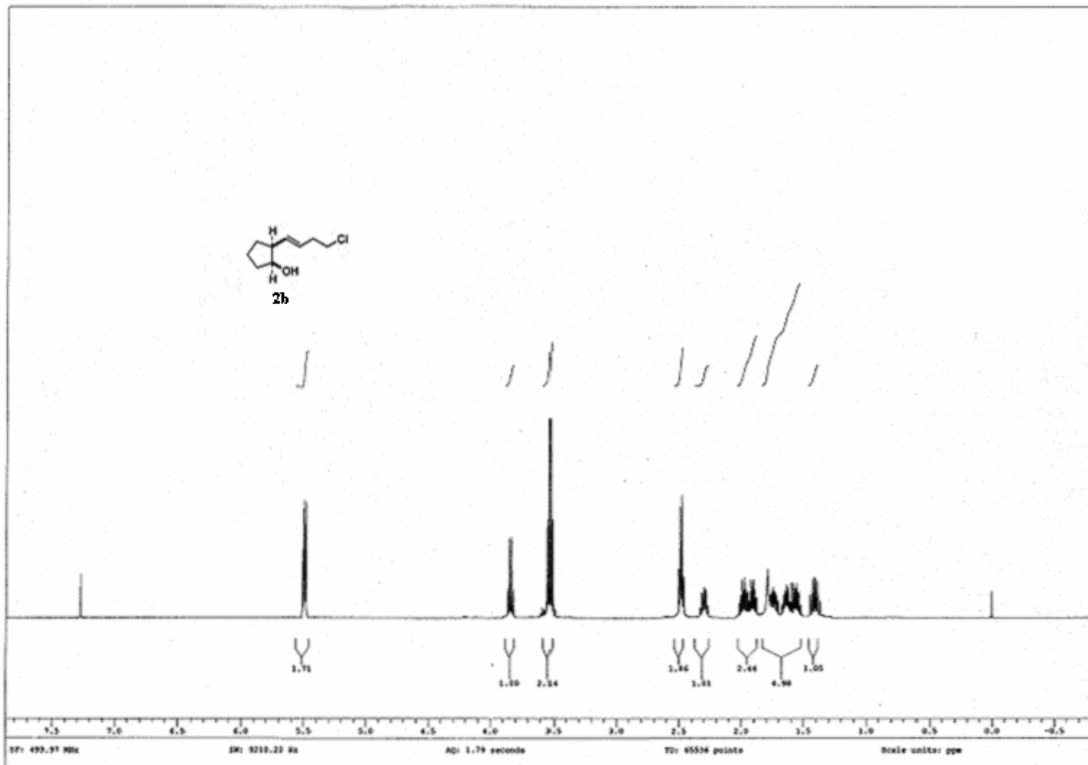

Pulse Sequence: zgpg30

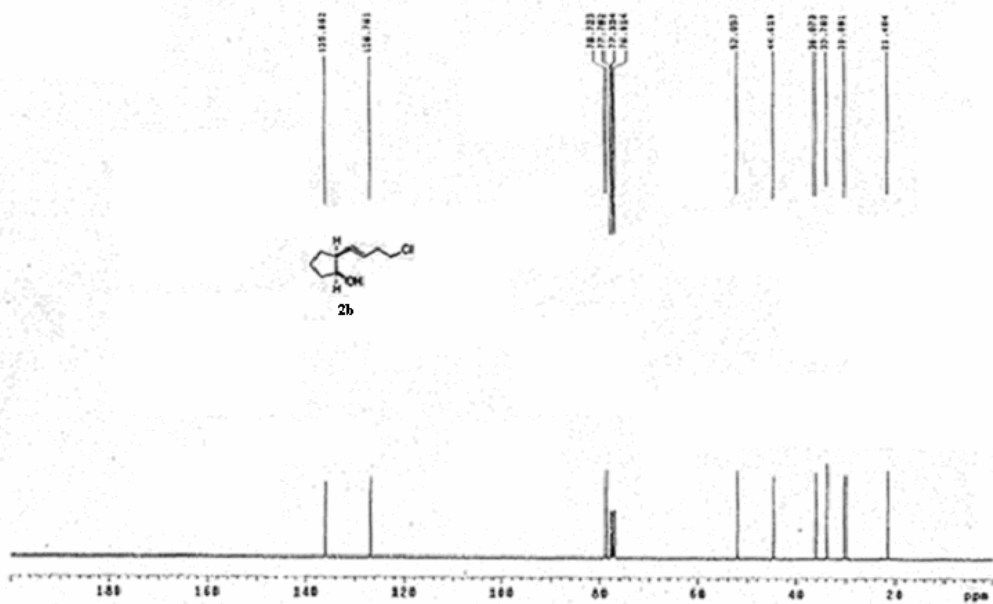

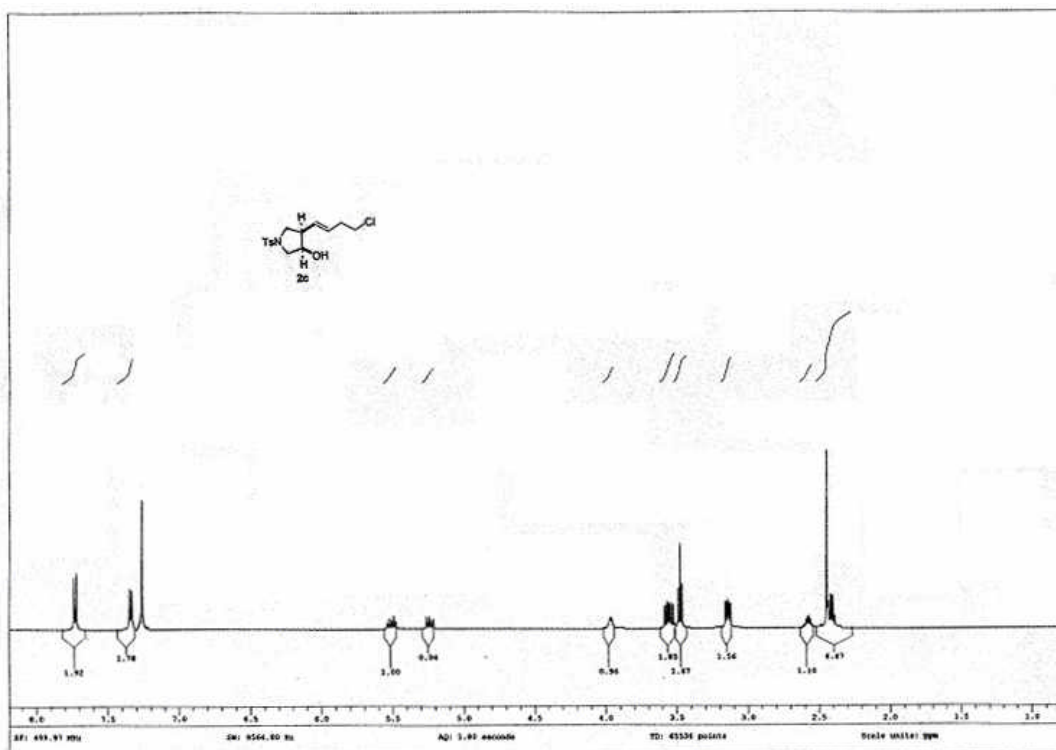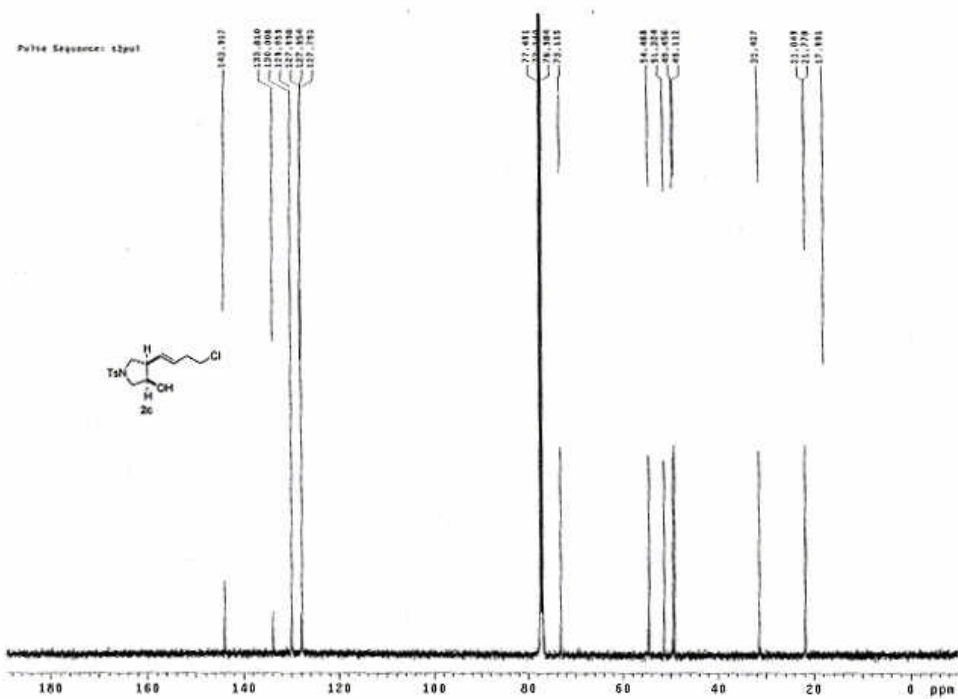

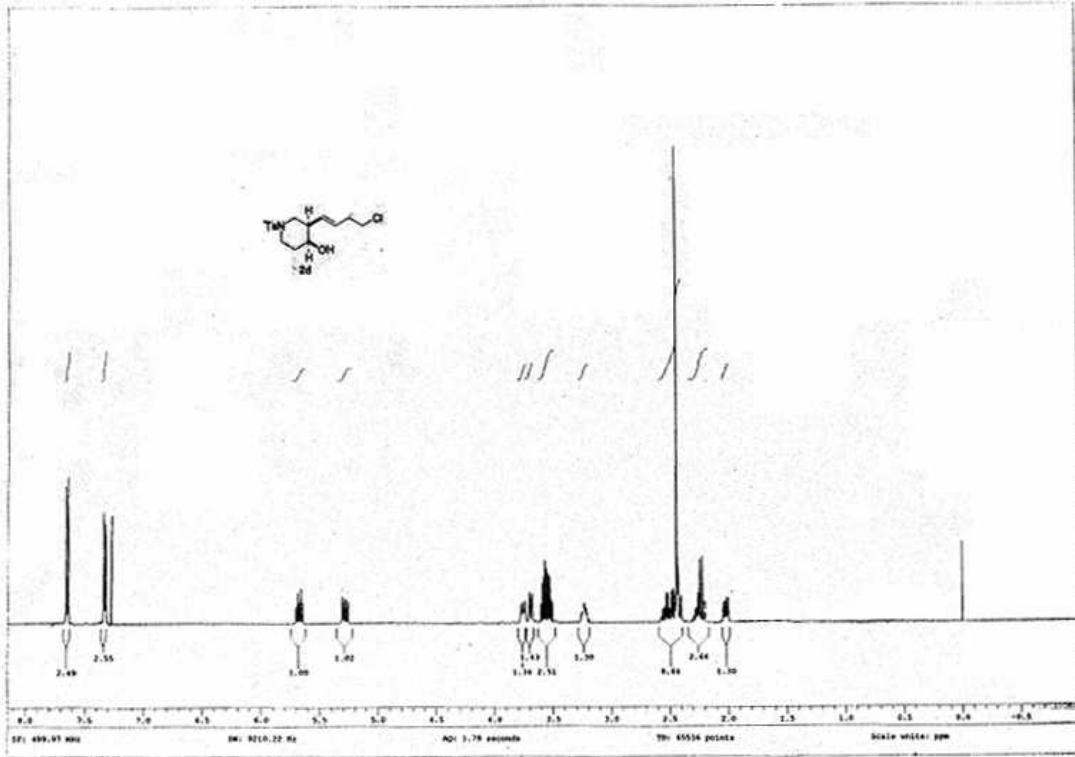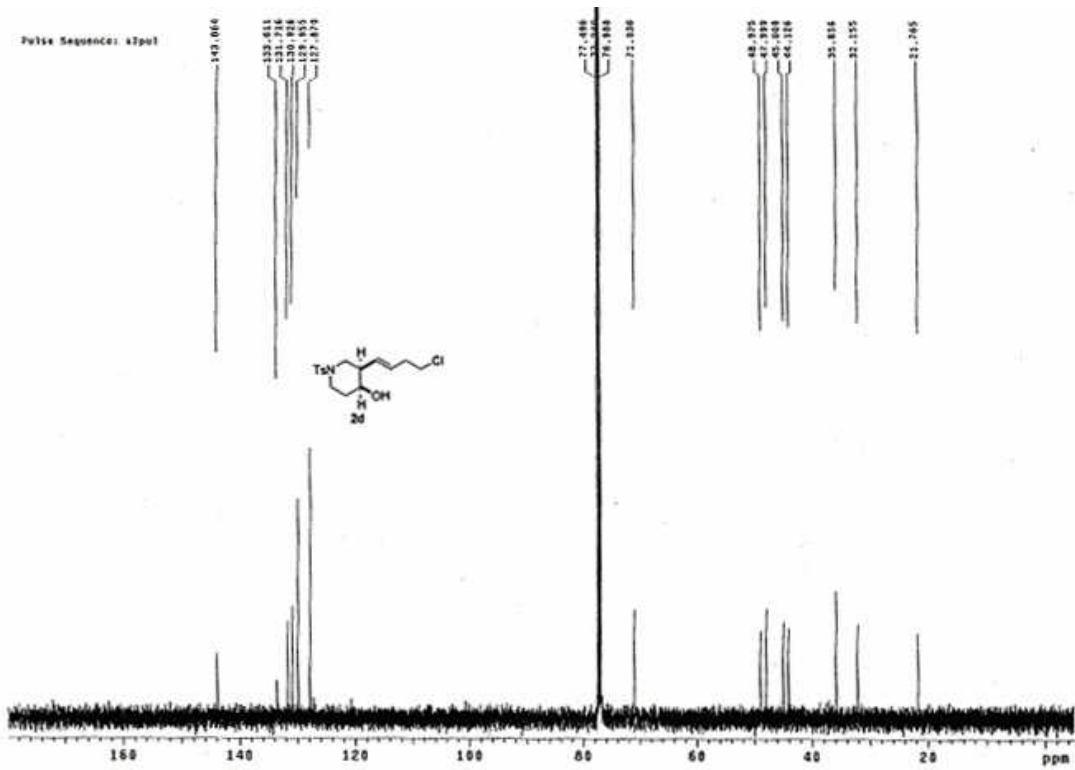



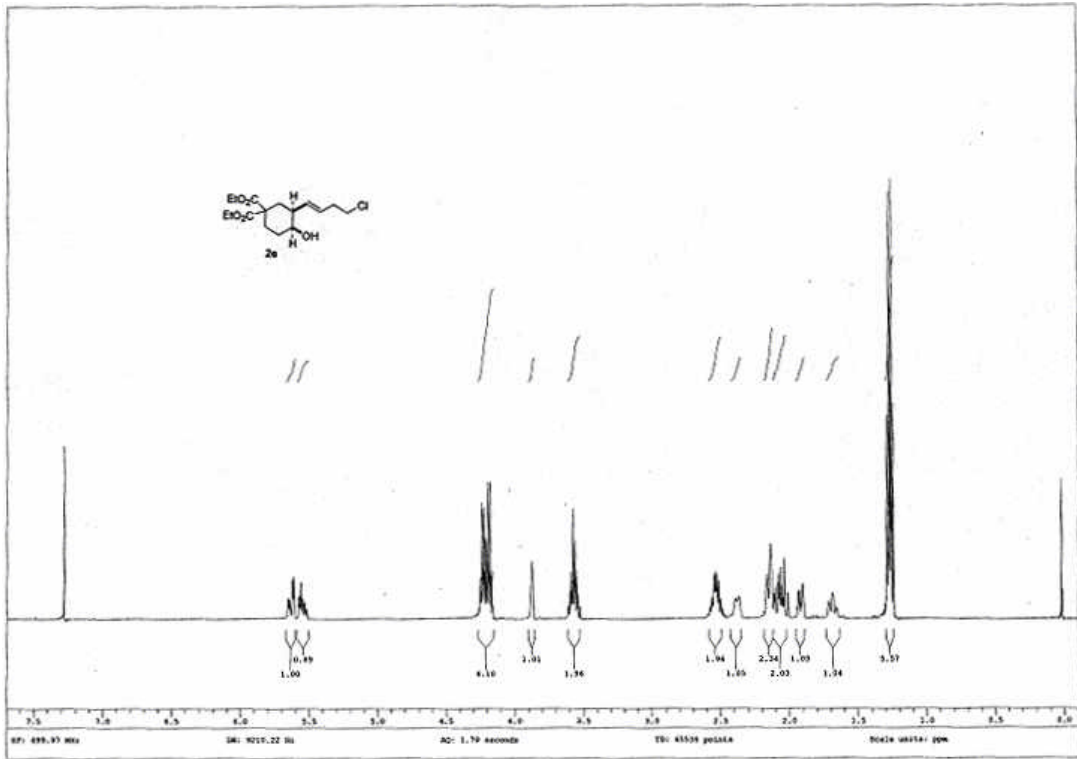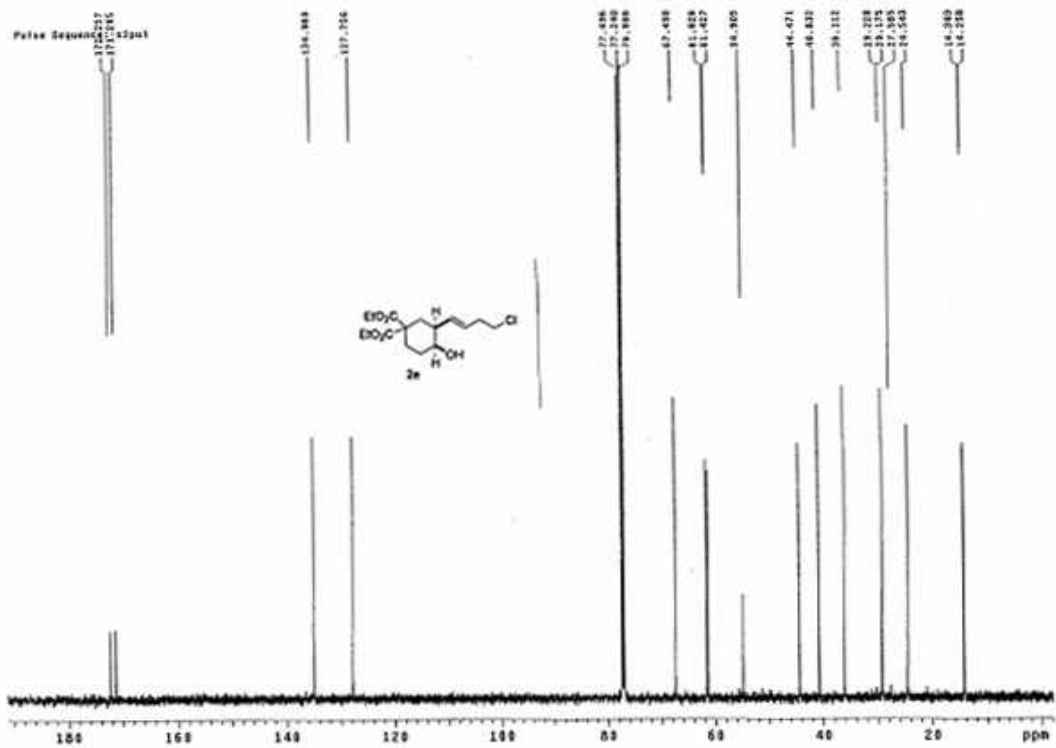

Supplement: b406362g.pdf [file b406362g.pdf]
